# Supplementary material
Source: PubMed Central journal article supplement (PMC8825681)
Supplement: NIHMS1765973-supplement-Supplementary_Table.pdf [file NIHMS1765973-supplement-Supplementary_Table.pdf]

**Supplementary Table 1. Formulas for calculating the Index of Concentration at the Extremes (ICE)**

ICE formulas calculated using the American Communities Survey (ACS; 2013) 5-year estimates

| Domain of Spatial Social Polarization |                           | Index of Concentration at the Extremes Formula                                                                                                                                                                                                                                              | ACS Variable | Variable Description                                                          |
|---------------------------------------|---------------------------|---------------------------------------------------------------------------------------------------------------------------------------------------------------------------------------------------------------------------------------------------------------------------------------------|--------------|-------------------------------------------------------------------------------|
| Economic segregation                  | Income                    | $\frac{(n \text{ persons living in } \geq \$100,000 \text{ income households}) - (n \text{ persons living in } \leq \$25,000 \text{ income households})}{\text{total } n \text{ population with household income data}}$                                                                    | S1901        | "Income in the past 12 months (in 2013 inflation-adjusted dollars)"           |
| Racial segregation                    | Race/ethnicity            | $\frac{(n \text{ "white alone" persons}) - (n \text{ "Black or African American alone" persons})}{\text{total } n \text{ population with race/ethnicity data}}$                                                                                                                             | B02001       | "Race"                                                                        |
| Racialized economic segregation       | Income and race/ethnicity | $\frac{(n \text{ "white alone" persons living in } \geq \$100,000 \text{ income households}) - (n \text{ "Black or African American alone" persons living in } \leq \$25,000 \text{ income households})}{\text{total } n \text{ population with household income and race/ethnicity data}}$ | B19001       | "Household income in the past 12 months (in 2013 inflation-adjusted dollars)" |

Source: American Communities Survey data available from the United States Census Bureau online. Supplemental Table 1 is adapted from Scally et al. references: 18-20, 24.

**Supplemental Table 2. Quintile cut-offs for segregation indices**

|                                 | 1        | 2        | 3        | 4        |
|---------------------------------|----------|----------|----------|----------|
| Economic Segregation            | -0.477   | -0.335   | -0.165   | 0.024    |
| Racial Segregation              | -0.84856 | -0.68957 | -0.40737 | 0.275763 |
| Racialized Economic Segregation | -0.44129 | -0.30128 | -0.16199 | 0.004208 |

For economic segregation, a value towards -1 indicates higher concentration of high-income (i.e., higher economic privilege) and a value towards 1 indicates higher low-income concentration (i.e., lower economic privilege). For racial segregation, a value of towards -1 indicates higher White racial composition (i.e., higher racial privilege) and a value towards 1 indicates higher Black racial composition (i.e., lower racial privilege). For racialized economic segregation, a value of towards -1 means indicates higher high-income White composition (i.e., higher racialized economic privilege) and a value towards 1 indicates higher low-income Black composition (i.e., lower racialized economic privilege).

**Supplemental Table 3. Economic and Black-White racial segregation indices by county in Maryland based on American Community Survey, 2011-2015**

| County          | Census Tracts<br>N | Segregation |       |      |       |       |        |       |      |       |       |                     |       |      |       |       |
|-----------------|--------------------|-------------|-------|------|-------|-------|--------|-------|------|-------|-------|---------------------|-------|------|-------|-------|
|                 |                    | Economic    |       |      |       |       | Racial |       |      |       |       | Racialized Economic |       |      |       |       |
|                 |                    | Median      | Mean  | SD   | Min   | Max   | Median | Mean  | SD   | Min   | Max   | Median              | Mean  | SD   | Min   | Max   |
| Allegany        | 23                 | 0.16        | 0.18  | 0.18 | -0.10 | 0.51  | -0.91  | -0.84 | 0.20 | -0.99 | -0.11 | -0.12               | -0.12 | 0.08 | -0.29 | 0.02  |
| Anne Arundel    | 102                | -0.37       | -0.34 | 0.21 | -1.00 | 0.24  | -0.73  | -0.62 | 0.31 | -0.97 | 0.49  | -0.38               | -0.36 | 0.18 | -1.00 | 0.06  |
| Baltimore       | 211                | -0.13       | -0.16 | 0.23 | -0.66 | 0.63  | -0.62  | -0.41 | 0.53 | -0.99 | 0.84  | -0.17               | -0.20 | 0.21 | -0.66 | 0.31  |
| Baltimore City  | 198                | 0.23        | 0.18  | 0.28 | -0.72 | 0.82  | 0.62   | 0.33  | 0.65 | -0.92 | 1.00  | 0.24                | 0.16  | 0.30 | -0.70 | 0.82  |
| Calvert         | 18                 | -0.38       | -0.38 | 0.16 | -0.64 | -0.11 | -0.72  | -0.69 | 0.15 | -0.90 | -0.28 | -0.41               | -0.40 | 0.12 | -0.58 | -0.15 |
| Caroline        | 9                  | -0.05       | 0.02  | 0.14 | -0.14 | 0.23  | -0.73  | -0.67 | 0.16 | -0.85 | -0.35 | -0.17               | -0.12 | 0.10 | -0.20 | 0.06  |
| Carroll         | 38                 | -0.33       | -0.30 | 0.15 | -0.60 | 0.05  | -0.92  | -0.89 | 0.07 | -0.97 | -0.66 | -0.40               | -0.40 | 0.10 | -0.59 | -0.15 |
| Cecil           | 19                 | -0.12       | -0.13 | 0.16 | -0.38 | 0.30  | -0.87  | -0.83 | 0.15 | -0.97 | -0.59 | -0.27               | -0.27 | 0.11 | -0.43 | 0.00  |
| Charles         | 30                 | -0.32       | -0.31 | 0.18 | -0.57 | 0.09  | -0.06  | -0.11 | 0.38 | -0.76 | 0.56  | -0.21               | -0.19 | 0.16 | -0.46 | 0.17  |
| Dorchester      | 9                  | 0.02        | 0.06  | 0.18 | -0.15 | 0.43  | -0.52  | -0.43 | 0.43 | -0.87 | 0.43  | -0.07               | -0.05 | 0.19 | -0.24 | 0.37  |
| Frederick       | 61                 | -0.30       | -0.30 | 0.22 | -0.69 | 0.25  | -0.84  | -0.75 | 0.23 | -1.00 | -0.06 | -0.36               | -0.35 | 0.16 | -0.69 | 0.10  |
| Garrett         | 7                  | 0.11        | 0.10  | 0.07 | -0.02 | 0.18  | -0.97  | -0.97 | 0.02 | -0.99 | -0.92 | -0.13               | -0.16 | 0.06 | -0.28 | -0.11 |
| Harford         | 57                 | -0.29       | -0.26 | 0.21 | -0.60 | 0.37  | -0.80  | -0.70 | 0.28 | -1.00 | 0.29  | -0.34               | -0.32 | 0.17 | -0.60 | 0.14  |
| Howard          | 55                 | -0.54       | -0.50 | 0.19 | -0.92 | -0.13 | -0.46  | -0.42 | 0.26 | -0.92 | 0.11  | -0.38               | -0.38 | 0.17 | -0.65 | -0.03 |
| Kent            | 5                  | -0.06       | -0.02 | 0.10 | -0.12 | 0.12  | -0.66  | -0.69 | 0.11 | -0.80 | -0.55 | -0.14               | -0.15 | 0.06 | -0.22 | -0.06 |
| Montgomery      | 215                | -0.43       | -0.42 | 0.25 | -0.87 | 0.14  | -0.44  | -0.41 | 0.33 | -0.96 | 0.74  | -0.32               | -0.34 | 0.22 | -0.86 | 0.11  |
| Prince George's | 218                | -0.17       | -0.21 | 0.23 | -0.81 | 0.51  | 0.59   | 0.45  | 0.41 | -0.64 | 0.97  | 0.01                | 0.00  | 0.14 | -0.51 | 0.29  |
| Queen Anne's    | 11                 | -0.31       | -0.31 | 0.13 | -0.48 | -0.08 | -0.81  | -0.81 | 0.10 | -0.94 | -0.64 | -0.41               | -0.37 | 0.12 | -0.52 | -0.19 |
| Somerset        | 7                  | 0.16        | 0.18  | 0.20 | -0.17 | 0.40  | -0.36  | -0.27 | 0.50 | -0.70 | 0.46  | -0.05               | -0.02 | 0.15 | -0.17 | 0.27  |
| St. Mary's      | 17                 | -0.35       | -0.28 | 0.17 | -0.52 | 0.09  | -0.76  | -0.66 | 0.24 | -0.89 | -0.13 | -0.37               | -0.32 | 0.17 | -0.53 | 0.02  |
| Talbot          | 10                 | -0.13       | -0.08 | 0.15 | -0.19 | 0.24  | -0.78  | -0.72 | 0.17 | -0.87 | -0.34 | -0.25               | -0.21 | 0.13 | -0.37 | 0.06  |
| Washington      | 31                 | 0.01        | 0.04  | 0.23 | -0.30 | 0.56  | -0.82  | -0.76 | 0.22 | -0.97 | 0.00  | -0.18               | -0.15 | 0.15 | -0.39 | 0.22  |
| Wicomico        | 19                 | 0.05        | 0.06  | 0.21 | -0.33 | 0.45  | -0.49  | -0.40 | 0.45 | -0.86 | 0.73  | -0.09               | -0.07 | 0.19 | -0.37 | 0.46  |

|           |      |       |       |      |       |      |       |       |      |       |      |       |       |      |       |      |
|-----------|------|-------|-------|------|-------|------|-------|-------|------|-------|------|-------|-------|------|-------|------|
| Worcester | 15   | -0.04 | -0.05 | 0.15 | -0.28 | 0.21 | -0.85 | -0.73 | 0.31 | -0.99 | 0.06 | -0.20 | -0.18 | 0.14 | -0.37 | 0.08 |
| Total     | 1385 | -0.20 | -0.19 | 0.30 | -1.00 | 0.82 | -0.47 | -0.26 | 0.62 | -1.00 | 1.00 | -0.18 | -0.17 | 0.27 | -1.00 | 0.82 |

For economic segregation, a value towards -1 indicates higher concentration of high-income (i.e., higher economic privilege) and a value towards 1 indicates higher low-income concentration (i.e., lower economic privilege). For racial segregation, a value of towards -1 indicates higher Black racial composition (i.e., lower racial privilege) and a value towards 1 indicates higher White racial composition (i.e., higher racial privilege). For racialized economic segregation, a value of towards -1 means indicates higher high-income White composition (i.e., higher racialized economic privilege) and a value towards 1 indicates higher low-income Black composition (i.e., lower racialized economic privilege).

**Supplemental Table 4. Age-adjusted hazard ratios and 95% confidence intervals for breast cancer-specific mortality associated with economic and Black-White racial segregation indices among women with breast cancer, overall and by race, age, and prognostic factors, Maryland Cancer Registry 2007-2017**

| Deaths<br>Person-Years                 | ER                                               |                         | Hormone Therapy (ER+ Only) |                         | Chemotherapy            |                         | Radiation               |                         | Stage                   |                           |                        |
|----------------------------------------|--------------------------------------------------|-------------------------|----------------------------|-------------------------|-------------------------|-------------------------|-------------------------|-------------------------|-------------------------|---------------------------|------------------------|
|                                        | ER-<br>1177<br>39768                             | ER+<br>2256<br>169941   | No<br>768<br>42113         | Yes<br>1146<br>95066    | No<br>1376<br>113588    | Yes<br>2054<br>89543    | No<br>2156<br>95528     | Yes<br>1245<br>106821   | Local<br>514<br>103430  | Regional<br>1120<br>48426 | Distant<br>925<br>4082 |
| <b>Economic Segregation</b>            |                                                  |                         |                            |                         |                         |                         |                         |                         |                         |                           |                        |
| Quintile 1                             | 1.00 (reference; most privileged/least deprived) |                         |                            |                         |                         |                         |                         |                         |                         |                           |                        |
| Quintile 2                             | 1.25**<br>(1.03, 1.53)                           | 1.14*<br>(0.98, 1.32)   | 1.27**<br>(1.01, 1.62)     | 0.99<br>(0.81, 1.22)    | 1.08<br>(0.88, 1.32)    | 1.23***<br>(1.06, 1.43) | 1.16*<br>(0.99, 1.35)   | 1.23**<br>(1.02, 1.49)  | 1.02<br>(0.76, 1.35)    | 1.29**<br>(1.05, 1.59)    | 0.94<br>(0.75, 1.18)   |
| Quintile 3                             | 1.11<br>(0.91, 1.35)                             | 1.24***<br>(1.08, 1.42) | 1.17<br>(0.91, 1.49)       | 1.19*<br>(0.99, 1.44)   | 1.16<br>(0.96, 1.40)    | 1.20**<br>(1.03, 1.40)  | 1.19**<br>(1.03, 1.38)  | 1.24**<br>(1.02, 1.51)  | 1.00<br>(0.74, 1.34)    | 1.38***<br>(1.14, 1.67)   | 1.00<br>(0.80, 1.26)   |
| Quintile 4                             | 1.32***<br>(1.10, 1.59)                          | 1.39***<br>(1.21, 1.60) | 1.38***<br>(1.09, 1.73)    | 1.35***<br>(1.11, 1.64) | 1.33***<br>(1.09, 1.61) | 1.38***<br>(1.19, 1.60) | 1.48***<br>(1.27, 1.72) | 1.35***<br>(1.11, 1.63) | 1.34**<br>(1.02, 1.76)  | 1.22*<br>(1.00, 1.50)     | 1.18<br>(0.94, 1.48)   |
| Quintile 5                             | 1.55***<br>(1.29, 1.86)                          | 1.69***<br>(1.47, 1.93) | 1.75***<br>(1.39, 2.20)    | 1.54***<br>(1.27, 1.87) | 1.58***<br>(1.31, 1.90) | 1.68***<br>(1.46, 1.93) | 1.68***<br>(1.47, 1.93) | 1.62***<br>(1.34, 1.95) | 1.46***<br>(1.11, 1.91) | 1.74***<br>(1.45, 2.08)   | 1.20*<br>(0.98, 1.48)  |
| P-interaction                          | 0.46                                             |                         | 0.36                       |                         | 0.85                    |                         | 0.59                    |                         | 0.19                    |                           |                        |
| <b>Racial Segregation</b>              |                                                  |                         |                            |                         |                         |                         |                         |                         |                         |                           |                        |
| Quintile 1                             | 1.00 (reference; most privileged/least deprived) |                         |                            |                         |                         |                         |                         |                         |                         |                           |                        |
| Quintile 2                             | 1.10<br>(0.90, 1.36)                             | 1.04<br>(0.91, 1.19)    | 0.91<br>(0.71, 1.17)       | 1.09<br>(0.91, 1.31)    | 1.04<br>(0.88, 1.24)    | 1.06<br>(0.91, 1.23)    | 1.01<br>(0.88, 1.17)    | 1.13<br>(0.94, 1.37)    | 1.18<br>(0.88, 1.58)    | 1.18<br>(0.96, 1.44)      | 0.89<br>(0.71, 1.11)   |
| Quintile 3                             | 1.01<br>(0.82, 1.24)                             | 1.11<br>(0.97, 1.27)    | 0.96<br>(0.75, 1.23)       | 1.23**<br>(1.02, 1.47)  | 1.18*<br>(1.00, 1.40)   | 1.10<br>(0.95, 1.28)    | 1.08<br>(0.94, 1.24)    | 1.15<br>(0.95, 1.40)    | 1.09<br>(0.81, 1.47)    | 1.10<br>(0.90, 1.35)      | 1.05<br>(0.85, 1.29)   |
| Quintile 4                             | 1.28**<br>(1.05, 1.55)                           | 1.38***<br>(1.21, 1.58) | 1.34**<br>(1.07, 1.67)     | 1.45***<br>(1.21, 1.75) | 1.45***<br>(1.23, 1.72) | 1.42***<br>(1.23, 1.63) | 1.36***<br>(1.19, 1.56) | 1.53***<br>(1.28, 1.83) | 1.67***<br>(1.26, 2.21) | 1.38***<br>(1.13, 1.67)   | 0.96<br>(0.78, 1.18)   |
| Quintile 5                             | 1.35***<br>(1.12, 1.62)                          | 1.44***<br>(1.26, 1.64) | 1.39***<br>(1.11, 1.73)    | 1.44***<br>(1.19, 1.73) | 1.58***<br>(1.33, 1.87) | 1.45***<br>(1.26, 1.66) | 1.44***<br>(1.26, 1.64) | 1.71***<br>(1.43, 2.05) | 1.66***<br>(1.25, 2.22) | 1.63***<br>(1.35, 1.96)   | 1.07<br>(0.87, 1.31)   |
| P-interaction                          | 0.74                                             |                         | 0.46                       |                         | 0.87                    |                         | 0.69                    |                         | 0.02                    |                           |                        |
| <b>Racialized Economic Segregation</b> |                                                  |                         |                            |                         |                         |                         |                         |                         |                         |                           |                        |
| Quintile 1                             | 1.00 (reference; most privileged/least deprived) |                         |                            |                         |                         |                         |                         |                         |                         |                           |                        |
| Quintile 2                             | 1.05<br>(0.85, 1.30)                             | 1.16**<br>(1.00, 1.34)  | 1.11<br>(0.86, 1.43)       | 1.18<br>(0.97, 1.44)    | 1.06<br>(0.87, 1.28)    | 1.23**<br>(1.05, 1.44)  | 1.06<br>(0.91, 1.24)    | 1.24**<br>(1.02, 1.52)  | 1.03<br>(0.75, 1.41)    | 1.20*<br>(0.98, 1.47)     | 0.92<br>(0.74, 1.16)   |
| Quintile 3                             | 1.24**<br>(1.00, 1.52)                           | 1.34***<br>(1.16, 1.55) | 1.17<br>(0.91, 1.49)       | 1.43***<br>(1.18, 1.74) | 1.18*<br>(0.98, 1.43)   | 1.42***<br>(1.22, 1.66) | 1.31***<br>(1.12, 1.52) | 1.41***<br>(1.16, 1.71) | 1.35**<br>(1.01, 1.81)  | 1.25**<br>(1.01, 1.53)    | 1.09<br>(0.88, 1.35)   |
| Quintile 4                             | 1.16<br>(0.94, 1.43)                             | 1.46***<br>(1.27, 1.69) | 1.34**<br>(1.06, 1.69)     | 1.58***<br>(1.30, 1.93) | 1.27**<br>(1.05, 1.53)  | 1.53***<br>(1.31, 1.78) | 1.33***<br>(1.13, 1.56) | 1.55***<br>(1.28, 1.88) | 1.55***<br>(1.17, 2.05) | 1.28**<br>(1.05, 1.56)    | 1.07<br>(0.86, 1.32)   |
| Quintile 5                             | 1.51***<br>(1.24, 1.82)                          | 1.79***<br>(1.56, 2.06) | 1.77***<br>(1.41, 2.21)    | 1.77***<br>(1.45, 2.16) | 1.80***<br>(1.50, 2.16) | 1.77***<br>(1.53, 2.05) | 1.70***<br>(1.47, 1.97) | 2.01***<br>(1.68, 2.41) | 1.72***<br>(1.30, 2.29) | 1.72***<br>(1.43, 2.07)   | 1.26**<br>(1.03, 1.54) |
| P-interaction                          | 0.49                                             |                         | 0.48                       |                         | 0.13                    |                         | 0.63                    |                         | 0.49                    |                           |                        |

\*p-value<0.1, \*\*p-value<0.05, \*\*\*p-value<0.01

For economic segregation, a quintile towards 1 indicates higher concentration of high-income households (i.e., higher economic privilege) and a quintile towards 5 indicates higher concentration of low-income households (i.e., lower economic privilege). For racial segregation, a quintile towards 1 indicates higher concentration of White households (i.e., higher racial privilege) and a quintile towards 5 indicates higher concentration of Black households (i.e., lower racial privilege). For racialized economic segregation, a quintile of towards 1 indicates higher concentration of high-income White households (i.e., higher racialized economic privilege) and quintile towards 5 indicates higher concentration of low-income Black household (i.e., lower racialized economic privilege).

**Supplemental Table 5. Age- and race-adjusted hazard ratios and 95% confidence intervals for breast cancer-specific mortality associated with economic and Black-White racial segregation indices among women with breast cancer, overall and by age and prognostic factors, Maryland Cancer Registry 2007-2017**

|                                 | Overall                                          | Age          |              | Stage        |              |              |
|---------------------------------|--------------------------------------------------|--------------|--------------|--------------|--------------|--------------|
|                                 |                                                  | <60          | 60+          | Local        | Regional     | Distant      |
| Deaths                          | 3739                                             | 1665         | 2074         | 514          | 1120         | 925          |
| Person-Years                    | 216295                                           | 111699       | 104596       | 103430       | 48426        | 4082         |
| Economic Segregation            |                                                  |              |              |              |              |              |
| Quintile 1                      | 1.00 (reference; most privileged/least deprived) |              |              |              |              |              |
| Quintile 2                      | 1.16**                                           | 1.25**       | 1.09         | 1.00         | 1.28**       | 0.93         |
|                                 | (1.03, 1.31)                                     | (1.05, 1.49) | (0.93, 1.28) | (0.75, 1.33) | (1.04, 1.57) | (0.75, 1.17) |
| Quintile 3                      | 1.16***                                          | 1.26***      | 1.07         | 0.95         | 1.32***      | 0.99         |
|                                 | (1.04, 1.30)                                     | (1.07, 1.50) | (0.92, 1.24) | (0.71, 1.28) | (1.09, 1.60) | (0.79, 1.25) |
| Quintile 4                      | 1.32***                                          | 1.38***      | 1.25***      | 1.24         | 1.14         | 1.17         |
|                                 | (1.17, 1.47)                                     | (1.16, 1.64) | (1.08, 1.44) | (0.95, 1.63) | (0.93, 1.40) | (0.93, 1.46) |
| Quintile 5                      | 1.43***                                          | 1.61***      | 1.31***      | 1.21         | 1.45***      | 1.17         |
|                                 | (1.28, 1.60)                                     | (1.36, 1.90) | (1.14, 1.51) | (0.92, 1.60) | (1.20, 1.76) | (0.94, 1.45) |
| P-interaction                   |                                                  | 0.40         |              | 0.30         |              |              |
| Racial Segregation              |                                                  |              |              |              |              |              |
| Quintile 1                      | 1.00 (reference; most privileged/least deprived) |              |              |              |              |              |
| Quintile 2                      | 1.04                                             | 1.05         | 1.03         | 1.15         | 1.15         | 0.87         |
|                                 | (0.92, 1.17)                                     | (0.88, 1.25) | (0.90, 1.19) | (0.85, 1.56) | (0.94, 1.40) | (0.70, 1.10) |
| Quintile 3                      | 1.05                                             | 1.02         | 1.07         | 1.01         | 1.01         | 1.03         |
|                                 | (0.93, 1.18)                                     | (0.86, 1.21) | (0.93, 1.24) | (0.74, 1.36) | (0.82, 1.24) | (0.83, 1.27) |
| Quintile 4                      | 1.19***                                          | 1.20**       | 1.18**       | 1.38**       | 1.11         | 0.91         |
|                                 | (1.06, 1.34)                                     | (1.00, 1.43) | (1.02, 1.36) | (1.03, 1.85) | (0.90, 1.38) | (0.73, 1.14) |
| Quintile 5                      | 1.07                                             | 1.07         | 1.08         | 1.05         | 1.05         | 0.95         |
|                                 | (0.93, 1.22)                                     | (0.88, 1.30) | (0.92, 1.28) | (0.73, 1.50) | (0.83, 1.33) | (0.73, 1.23) |
| P-interaction                   |                                                  | 0.97         |              | 0.18         |              |              |
| Racialized Economic Segregation |                                                  |              |              |              |              |              |
| Quintile 1                      | 1.00 (reference; most privileged/least deprived) |              |              |              |              |              |
| Quintile 2                      | 1.12*                                            | 1.16         | 1.09         | 1.01         | 1.17         | 0.92         |
|                                 | (0.99, 1.27)                                     | (0.97, 1.40) | (0.93, 1.28) | (0.73, 1.38) | (0.95, 1.43) | (0.73, 1.16) |
| Quintile 3                      | 1.27***                                          | 1.37***      | 1.19**       | 1.27         | 1.14         | 1.08         |
|                                 | (1.13, 1.43)                                     | (1.14, 1.65) | (1.03, 1.38) | (0.95, 1.71) | (0.93, 1.40) | (0.87, 1.34) |
| Quintile 4                      | 1.26***                                          | 1.41***      | 1.14         | 1.33*        | 1.09         | 1.06         |
|                                 | (1.11, 1.42)                                     | (1.16, 1.70) | (0.97, 1.33) | (0.99, 1.79) | (0.89, 1.34) | (0.85, 1.31) |
| Quintile 5                      | 1.39***                                          | 1.46***      | 1.37***      | 1.19         | 1.22*        | 1.22*        |
|                                 | (1.22, 1.59)                                     | (1.19, 1.78) | (1.16, 1.63) | (0.86, 1.65) | (0.99, 1.52) | (0.97, 1.54) |
| P-interaction                   |                                                  | 0.34         |              | 0.62         |              |              |

\*p-value<0.1, \*\*p-value<0.05, \*\*\*p-value<0.01

For economic segregation, a value towards -1 indicates higher concentration of high-income (i.e., higher economic privilege) and a value towards 1 indicates higher low-income concentration (i.e., lower economic privilege). For racial segregation, a value of towards -1 indicates higher White racial composition (i.e., higher racial privilege) and a value

towards 1 indicates higher Black racial composition (i.e., lower racial privilege). For racialized economic segregation, a value of towards -1 means indicates higher high-income White composition (i.e., higher racialized economic privilege) and a value towards 1 indicates higher low-income Black composition (i.e., lower racialized economic privilege).

**Supplemental Table 5 (continued). Age- and race-adjusted hazard ratios and 95% confidence intervals for breast cancer-specific mortality associated with economic and Black-White racial segregation indices among women with breast cancer, overall and by age and prognostic factors, Maryland Cancer Registry 2007-2017**

| Deaths<br>Person-Years          | ER                                               |                         | Hormone Therapy (ER+ Only) |                         | Chemotherapy            |                         | Radiation               |                         |
|---------------------------------|--------------------------------------------------|-------------------------|----------------------------|-------------------------|-------------------------|-------------------------|-------------------------|-------------------------|
|                                 | ER-<br>1177<br>39768                             | ER+<br>2256<br>169941   | No<br>768<br>42113         | Yes<br>1146<br>95066    | No<br>1376<br>113588    | Yes<br>2054<br>89543    | No<br>2156<br>95528     | Yes<br>1245<br>106821   |
| Economic Segregation            |                                                  |                         |                            |                         |                         |                         |                         |                         |
| Quintile 1                      | 1.00 (reference; most privileged/least deprived) |                         |                            |                         |                         |                         |                         |                         |
| Quintile 2                      | 1.22**<br>(1.00, 1.50)                           | 1.13<br>(0.98, 1.31)    | 1.26*<br>(1.00, 1.60)      | 0.99<br>(0.80, 1.21)    | 1.06<br>(0.86, 1.30)    | 1.21**<br>(1.05, 1.41)  | 1.14*<br>(0.98, 1.34)   | 1.21**<br>(1.01, 1.45)  |
| Quintile 3                      | 1.07<br>(0.89, 1.31)                             | 1.21***<br>(1.05, 1.39) | 1.15<br>(0.89, 1.47)       | 1.18*<br>(0.97, 1.42)   | 1.12<br>(0.93, 1.35)    | 1.17**<br>(1.01, 1.36)  | 1.15*<br>(1.00, 1.33)   | 1.19*<br>(0.98, 1.44)   |
| Quintile 4                      | 1.25**<br>(1.03, 1.50)                           | 1.34***<br>(1.16, 1.54) | 1.33**<br>(1.05, 1.68)     | 1.31***<br>(1.08, 1.60) | 1.26**<br>(1.04, 1.53)  | 1.32***<br>(1.14, 1.53) | 1.40***<br>(1.20, 1.63) | 1.25**<br>(1.04, 1.52)  |
| Quintile 5                      | 1.38***<br>(1.15, 1.66)                          | 1.52***<br>(1.32, 1.75) | 1.58***<br>(1.25, 2.00)    | 1.45***<br>(1.19, 1.76) | 1.36***<br>(1.13, 1.64) | 1.52***<br>(1.32, 1.75) | 1.46***<br>(1.26, 1.68) | 1.38***<br>(1.14, 1.67) |
|                                 | 0.45                                             |                         | 0.41                       |                         | 0.78                    |                         | 0.59                    |                         |
| Racial Segregation              |                                                  |                         |                            |                         |                         |                         |                         |                         |
| Quintile 1                      | 1.00 (reference; most privileged/least deprived) |                         |                            |                         |                         |                         |                         |                         |
| Quintile 2                      | 1.07<br>(0.87, 1.32)                             | 1.02<br>(0.89, 1.18)    | 0.90<br>(0.70, 1.15)       | 1.08<br>(0.89, 1.31)    | 1.02<br>(0.86, 1.22)    | 1.04<br>(0.89, 1.20)    | 0.99<br>(0.86, 1.14)    | 1.11<br>(0.91, 1.34)    |
| Quintile 3                      | 0.93<br>(0.76, 1.15)                             | 1.06<br>(0.92, 1.22)    | 0.92<br>(0.72, 1.19)       | 1.20**<br>(1.00, 1.44)  | 1.12<br>(0.94, 1.33)    | 1.05<br>(0.91, 1.23)    | 1.01<br>(0.87, 1.16)    | 1.08<br>(0.89, 1.31)    |
| Quintile 4                      | 1.07<br>(0.87, 1.33)                             | 1.23***<br>(1.07, 1.42) | 1.19<br>(0.94, 1.50)       | 1.37***<br>(1.13, 1.66) | 1.25**<br>(1.04, 1.49)  | 1.26***<br>(1.08, 1.46) | 1.15*<br>(0.99, 1.32)   | 1.29***<br>(1.07, 1.57) |
| Quintile 5                      | 0.98<br>(0.78, 1.22)                             | 1.09<br>(0.92, 1.30)    | 1.06<br>(0.80, 1.41)       | 1.23*<br>(0.97, 1.57)   | 1.07<br>(0.87, 1.32)    | 1.14<br>(0.96, 1.35)    | 0.98<br>(0.83, 1.16)    | 1.19<br>(0.95, 1.48)    |
|                                 | 0.49                                             |                         | 0.56                       |                         | 0.90                    |                         | 0.72                    |                         |
| Racialized Economic Segregation |                                                  |                         |                            |                         |                         |                         |                         |                         |
| Quintile 1                      | 1.00 (reference; most privileged/least deprived) |                         |                            |                         |                         |                         |                         |                         |
| Quintile 2                      | 1.03<br>(0.83, 1.28)                             | 1.15*<br>(0.99, 1.33)   | 1.10<br>(0.85, 1.42)       | 1.18<br>(0.96, 1.44)    | 1.05<br>(0.86, 1.27)    | 1.22**<br>(1.04, 1.43)  | 1.05<br>(0.89, 1.22)    | 1.22**<br>(1.00, 1.49)  |
| Quintile 3                      | 1.17<br>(0.95, 1.45)                             | 1.30***<br>(1.13, 1.50) | 1.14<br>(0.89, 1.46)       | 1.41***<br>(1.16, 1.72) | 1.13<br>(0.94, 1.37)    | 1.37***<br>(1.18, 1.60) | 1.24***<br>(1.06, 1.45) | 1.33***<br>(1.10, 1.62) |
| Quintile 4                      | 1.04<br>(0.84, 1.28)                             | 1.37***<br>(1.18, 1.59) | 1.25*<br>(0.98, 1.60)      | 1.54***<br>(1.26, 1.90) | 1.16<br>(0.96, 1.41)    | 1.41***<br>(1.20, 1.65) | 1.20**<br>(1.01, 1.41)  | 1.36***<br>(1.11, 1.67) |
| Quintile 5                      | 1.20*<br>(0.97, 1.50)                            | 1.52***<br>(1.29, 1.80) | 1.52***<br>(1.16, 1.99)    | 1.65***<br>(1.30, 2.09) | 1.39***<br>(1.13, 1.71) | 1.51***<br>(1.27, 1.79) | 1.32***<br>(1.11, 1.56) | 1.54***<br>(1.24, 1.90) |
|                                 | 0.24                                             |                         | 0.56                       |                         | 0.43                    |                         | 0.70                    |                         |

\*p-value<0.1, \*\*p-value<0.05, \*\*\*p-value<0.01

For economic segregation, a quintile towards 1 indicates higher concentration of high-income households (i.e., higher economic privilege) and a quintile towards 5 indicates higher concentration of low-income households (i.e., lower economic privilege). For racial segregation, a quintile towards 1 indicates higher concentration of White households (i.e., higher racial privilege) and a quintile towards 5 indicates higher concentration of Black households (i.e., lower racial privilege). For racialized economic segregation, a quintile towards 1 indicates higher concentration of high-income White households (i.e., higher racialized economic privilege) and a quintile towards 5 indicates higher concentration of low-income Black households (i.e., lower racialized economic privilege).



**Supplemental Table 6. Age-adjusted hazard ratios and 95% confidence intervals for breast cancer-specific mortality associated with economic and Black-White racial segregation indices among women with breast cancer by time since diagnosis, Maryland Cancer Registry 2007-2017**

|                                        | Years 0-5<br>2965 deaths<br>144,863 person-years |              | Years 5+<br>774 deaths<br>71,432 person-years |              |
|----------------------------------------|--------------------------------------------------|--------------|-----------------------------------------------|--------------|
|                                        | HR                                               | 95% CI       | HR                                            | 95% CI       |
| <b>Economic Segregation</b>            |                                                  |              |                                               |              |
| Quintile 1                             | Reference (most privileged)                      |              | Reference (most privileged)                   |              |
| Quintile 2                             | 1.17**                                           | (1.03, 1.33) | 1.22*                                         | (0.97, 1.53) |
| Quintile 3                             | 1.21***                                          | (1.07, 1.38) | 1.18                                          | (0.94, 1.49) |
| Quintile 4                             | 1.46***                                          | (1.30, 1.65) | 1.21*                                         | (0.97, 1.53) |
| Quintile 5                             | 1.77***                                          | (1.58, 1.99) | 1.31**                                        | (1.04, 1.64) |
| <b>Racial Segregation</b>              |                                                  |              |                                               |              |
| Quintile 1                             | Reference (most privileged)                      |              | Reference (most privileged)                   |              |
| Quintile 2                             | 1.04                                             | (0.92, 1.18) | 1.14                                          | (0.91, 1.43) |
| Quintile 3                             | 1.18***                                          | (1.05, 1.33) | 0.91                                          | (0.71, 1.16) |
| Quintile 4                             | 1.41***                                          | (1.25, 1.59) | 1.48***                                       | (1.19, 1.84) |
| Quintile 5                             | 1.69***                                          | (1.50, 1.89) | 1.16                                          | (0.92, 1.47) |
| <b>Racialized Economic Segregation</b> |                                                  |              |                                               |              |
| Quintile 1                             | Reference (most privileged)                      |              | Reference (most privileged)                   |              |
| Quintile 2                             | 1.14*                                            | (1.00, 1.29) | 1.17                                          | (0.93, 1.48) |
| Quintile 3                             | 1.33***                                          | (1.17, 1.5)  | 1.39***                                       | (1.11, 1.75) |
| Quintile 4                             | 1.45***                                          | (1.28, 1.64) | 1.32**                                        | (1.04, 1.66) |
| Quintile 5                             | 1.97***                                          | (1.75, 2.21) | 1.39***                                       | (1.10, 1.75) |

\*p-value<0.1, \*\*p-value<0.05, \*\*\*p-value<0.01

For economic segregation, a quintile towards 1 indicates higher concentration of high-income households (i.e., higher economic privilege) and a quintile towards 5 indicates higher concentration of low-income households (i.e., lower economic privilege). For racial segregation, a quintile towards 1 indicates higher concentration of White households (i.e., higher racial privilege) and a quintile towards 5 indicates higher concentration of Black households (i.e., lower racial privilege). For racialized economic segregation, a quintile of towards 1 indicates higher concentration of high-income White households (i.e., higher racialized economic privilege) and quintile towards 5 indicates higher concentration of low-income Black household (i.e., lower racialized economic privilege).
